# Supplementary material for: Enhanced photocurrent in organic photodetectors by the tunneling effect of a hafnium oxide thin film as an electron blocking layer
Source: Royal Society of Chemistry journal article supplement (doi:10.1039/c9ra06230k), 2019-01-01
Supplement: c9ra06230k1.pdf [file c9ra06230k1.pdf]

## Enhanced Photocurrent in Organic Photodetectors by Tunneling Effect of Hafnium Oxide Thin Film as an Electron Blocking Layer

Chan Hyuk Ji,<sup>a</sup> Ji Young Lee <sup>a</sup>, Kee Tae Kim<sup>a</sup> and Se Young Oh<sup>\*a</sup>

### Supporting Information

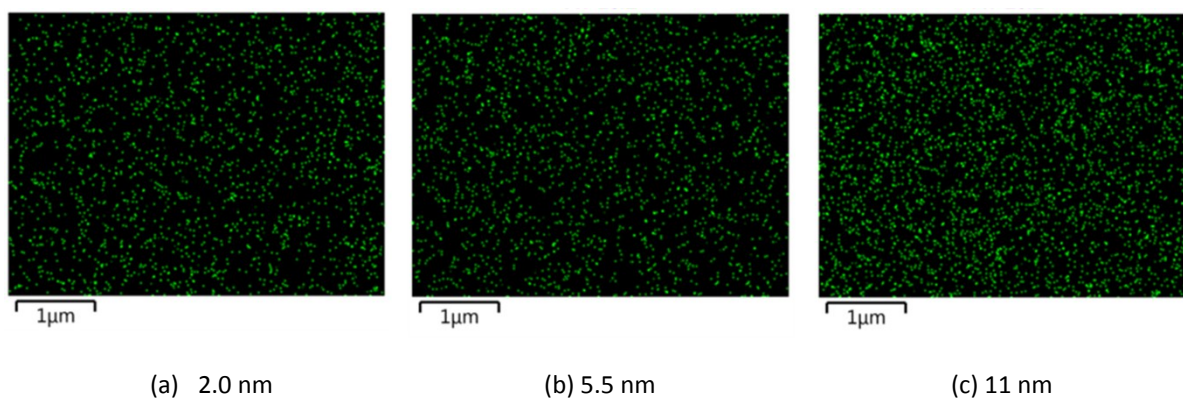

**Figure S1.** FE-SEM Images of various thickness of hafnium oxide using successive ionic layer deposition.

**Table S1.** Organic photodetector device (OPD) performance using different thicknesses of a aluminum oxide interlayer at -1 V

| Thickness (nm) | Photocurrent density (A/cm <sup>2</sup> ) | Dark current density (A/cm <sup>2</sup> ) |
|----------------|-------------------------------------------|-------------------------------------------|
| 3.0            | 4.96x10 <sup>-5</sup>                     | 2.26x10 <sup>-8</sup>                     |
| 6.0            | 7.51x10 <sup>-7</sup>                     | 3.52x10 <sup>-8</sup>                     |
| 10             | 2.21x10 <sup>-7</sup>                     | 1.29x10 <sup>-8</sup>                     |

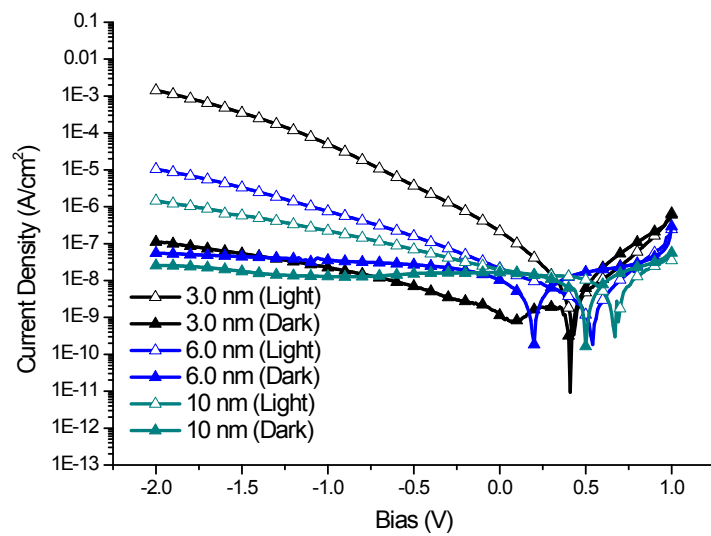

**Figure S2.** Current density-voltage curves of organic photodetector devices (OPDs) with various aluminum oxide electron blocking layer thicknesses.
